# Supplementary material for: Estimating exposure of residential assets to natural hazards in Europe using open data
Source: Copernicus journal article supplement (doi:10.5194/nhess-20-323-2020), 2020-01-28
Supplement: Supplementary file 1 [file nhess-20-323-2020-supplement.zip]

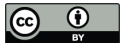

*Supplement of*

## **Estimating exposure of residential assets to natural hazards in Europe using open data**

**Dominik Paprotny et al.**

*Correspondence to:* Dominik Paprotny ([paprotny@gfz-potsdam.de](mailto:paprotny@gfz-potsdam.de))

- [nhess-20-323-2020-supplement-title-page.pdf](#)
- [SI1.pdf](#)
- [SI2.xlsx](#)

The copyright of individual parts of the supplement might differ from the CC BY 4.0 License.
