# Supplementary material for: Estimating exposure of residential assets to natural hazards in Europe using open data
Source: Copernicus journal article supplement (doi:10.5194/nhess-20-323-2020), 2020-01-28
Supplement: Supplementary file 3 [file nhess-20-323-2020-supplement.zip]

Archive with 3 entries (3 files):
- nhess-20-323-2020-supplement-title-page.pdf
- SI1.pdf
- SI2.xlsx
